# Supplementary material for: Environmentally benign multiphase solid–liquid–gas catalysis
Source: Royal Society of Chemistry journal article supplement (doi:10.1039/c9gc04063c), 2019-12-18
Supplement: c9gc04063c1.pdf [file c9gc04063c1.pdf]

## Supporting Information for

# An environmentally benign multiphase solid-liquid-gas catalysis

Xueli Bai,<sup>a</sup> Nianze Song,<sup>a</sup> Liang Wen,<sup>a</sup> Xin Huang,<sup>a</sup> Jian Zhang,<sup>a</sup> Yue Zhang,<sup>\*a</sup> and Yongxiang Zhao<sup>\*a</sup>

<sup>a</sup>Engineering Research Center of Ministry of Education for Fine Chemicals, and College of Chemistry and Chemical Engineering, Shanxi University, Taiyuan, Shanxi 030006, China.

\*Corresponding author (email: [zyue@sxu.edu.cn](mailto:zyue@sxu.edu.cn) and [yxzhao@sxu.edu.cn](mailto:yxzhao@sxu.edu.cn) )

**Chemicals:** All kinds of alcohols (AR) were purchased from Sinopharm. Acetonitrile (99%) was purchased from Merck. (Octyl)-trimethoxysilane (97.0%), n-propyltrimethoxysilane (98.0%), n-dodecyltrimethoxysilane (93.0%) and tetramethylammonium chloride (99.0%) were purchased from Sinopharm. DMSO-d<sub>6</sub> (99.9%) were purchased from Sigma-Aldrich.

**SI-1:** FT-IR spectrogram of the 3C-silyl-POM, 8C-silyl-POM and 12C-silyl-POM.

**SI-2:** FT-Raman spectrogram of the 3C-silyl-POM, 8C-silyl-POM and 12C-silyl-POM.

**SI-3:** <sup>1</sup>H NMR spectrum of the 3C-silyl-POM, 8C-silyl-POM and 12C-silyl-POM.

**SI-4:** Tungsten content of the POM, 3C-silyl-POM, 8C-silyl-POM and 12C-silyl-POM are detected by ICP.

**SI-5:** <sup>31</sup>P NMR spectrum of the 3C-silyl-POM, 8C-silyl-POM and 12C-silyl-POM.

**SI-6:** MALDI-TOF-MS spectrum of the 8C-silyl-POM.

**SI-7:** <sup>29</sup>Si NMR spectrum of the 8C-silyl-POM.

**SI-8:** XPS spectrum of the POM, 3C-silyl-POM, 8C-silyl-POM and 12C-silyl-POM

**SI-9:** FT-IR spectrogram of the recycled 8C-silyl-POM and fresh 8C-silyl-POM.

**SI-10:** <sup>1</sup>H NMR spectrum of the recycled 8C-silyl-POM and fresh 8C-silyl-POM.

**SI-11:** FT-Raman spectrogram of the recycled 8C-silyl-POM and fresh 8C-silyl-POM.

**SI-12:** XPS spectrum of the recycled 8C-silyl-POM and fresh 8C-silyl-POM.

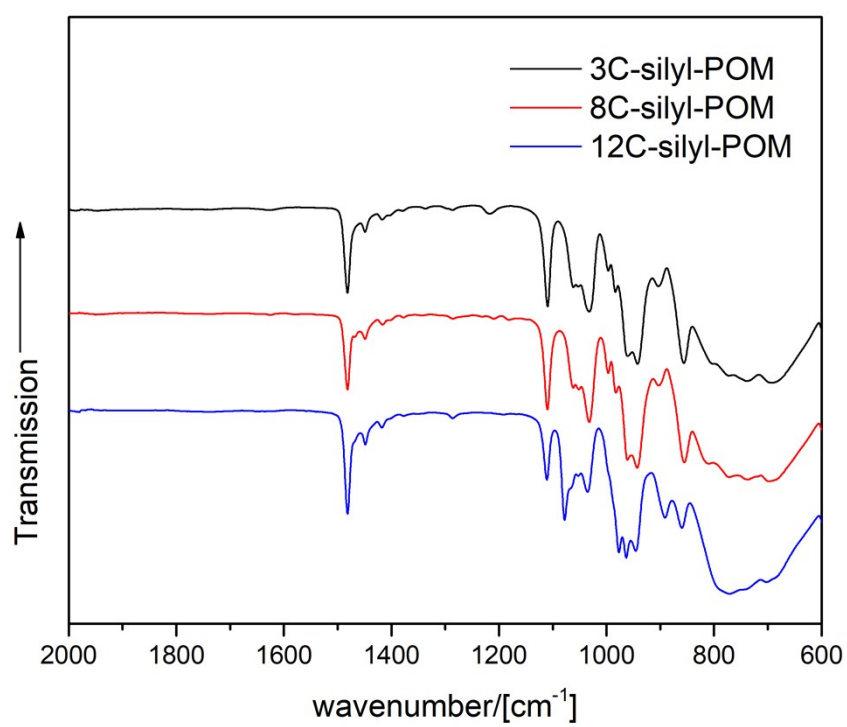

IR (ATR): 1110 (Si-O-Si), 1079~1030 (P-O), 997~940(W=O), 901~706(W-O-W)

**SI-1**

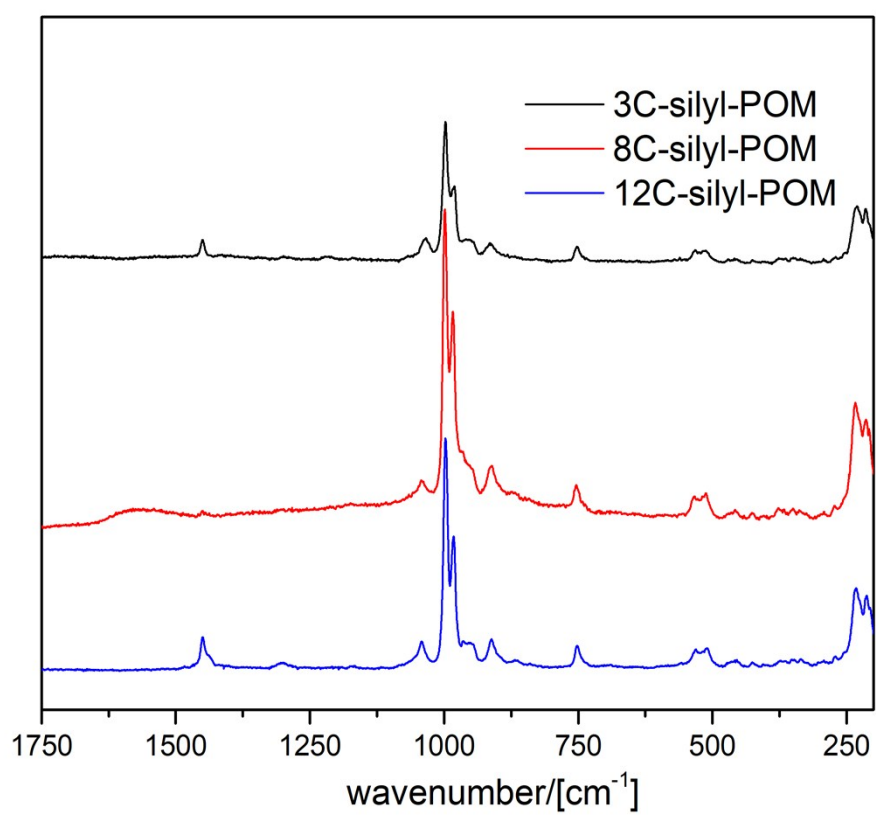

**SI-2**

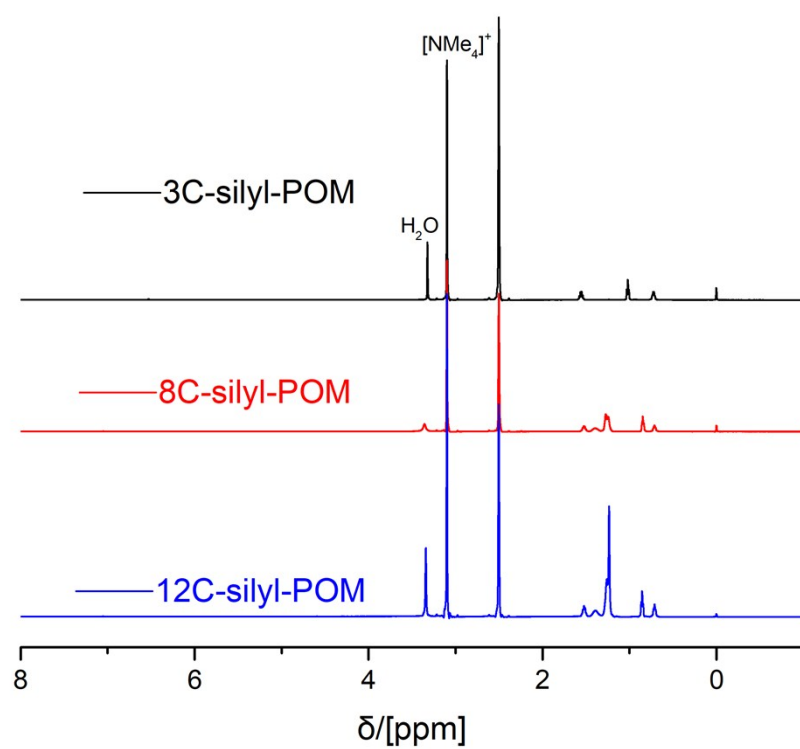

$^1\text{H}$  NMR ( $\text{DMSO-d}_6$ ):  $\delta = 3.11$  ( $[\text{NMe}_4]^+$ ),  $1.61\sim 1.14$  ( $-\text{CH}_2-$ ),  $0.85$  ( $-\text{CH}_3$ ),  $0.71$  ( $-\text{CH}_2\text{-Si}$ ).

**SI-3**

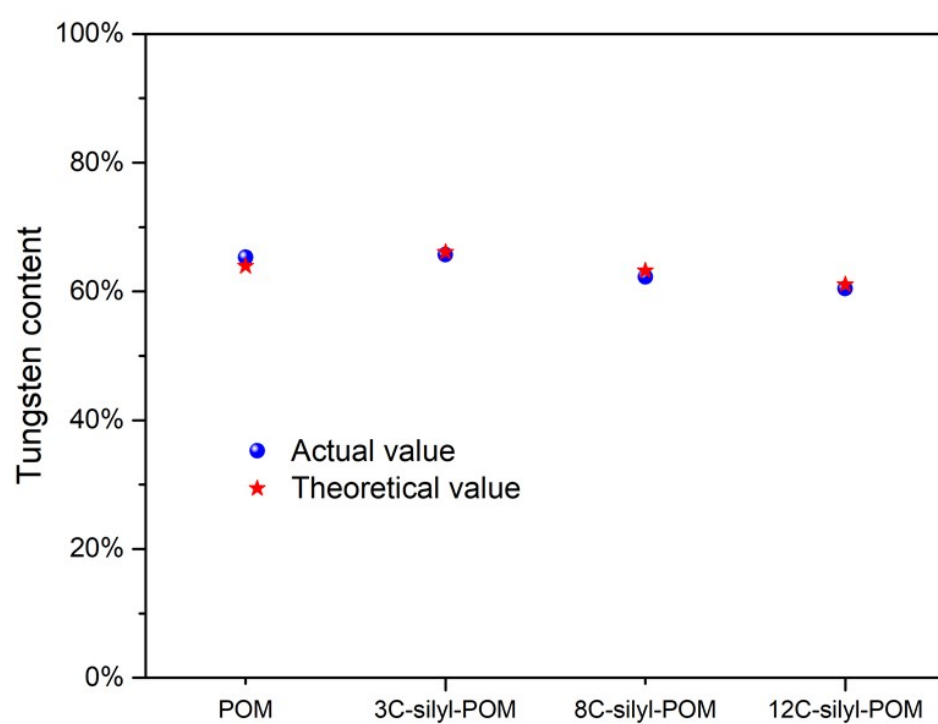

**SI-4**

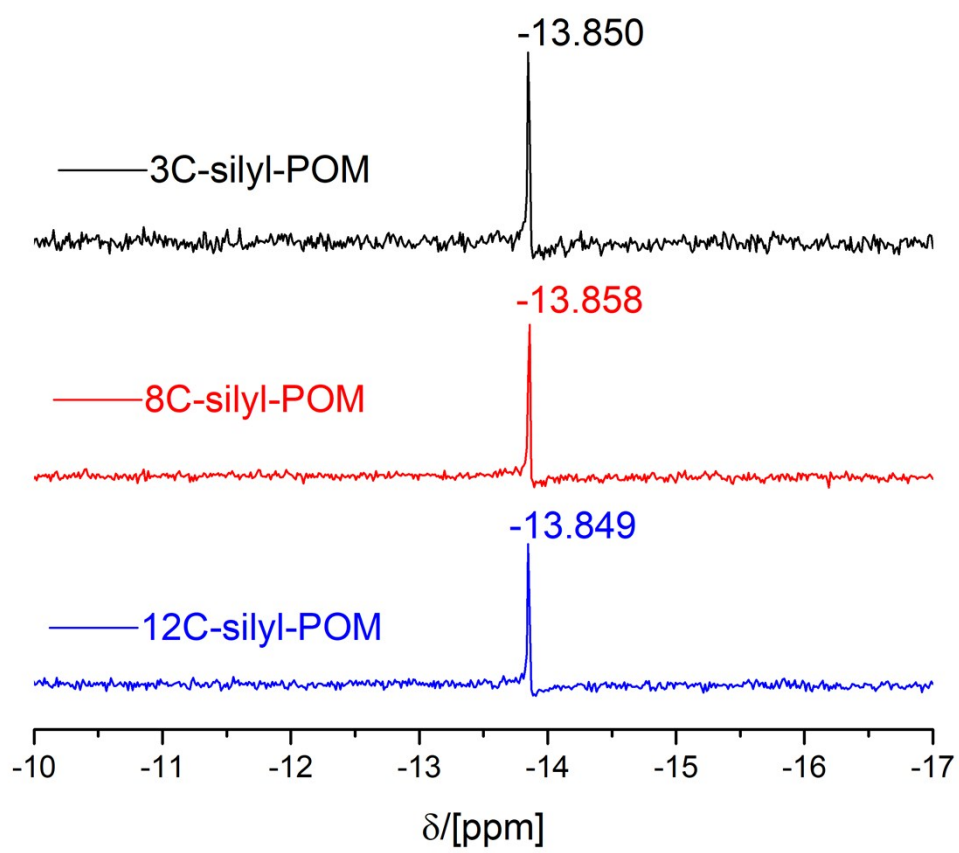

SI-5

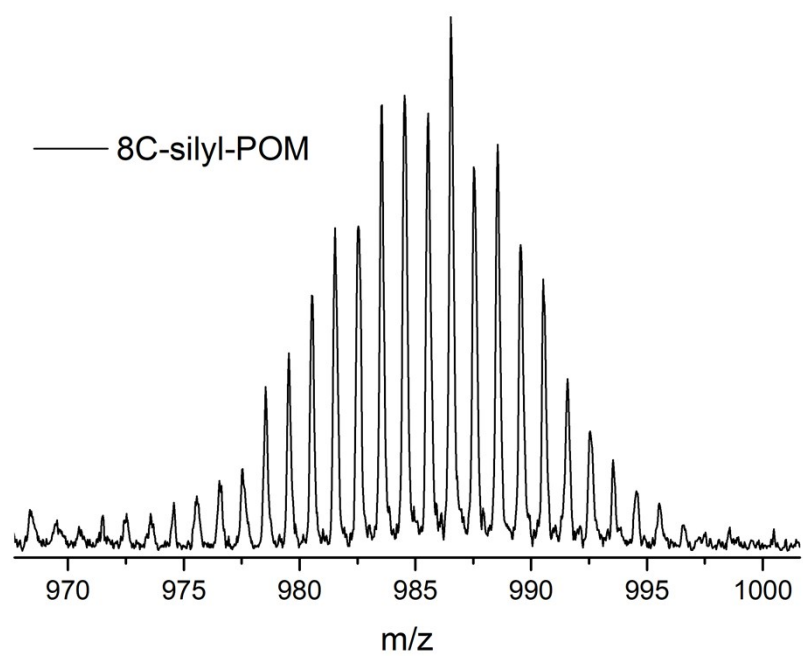

**SI-6**

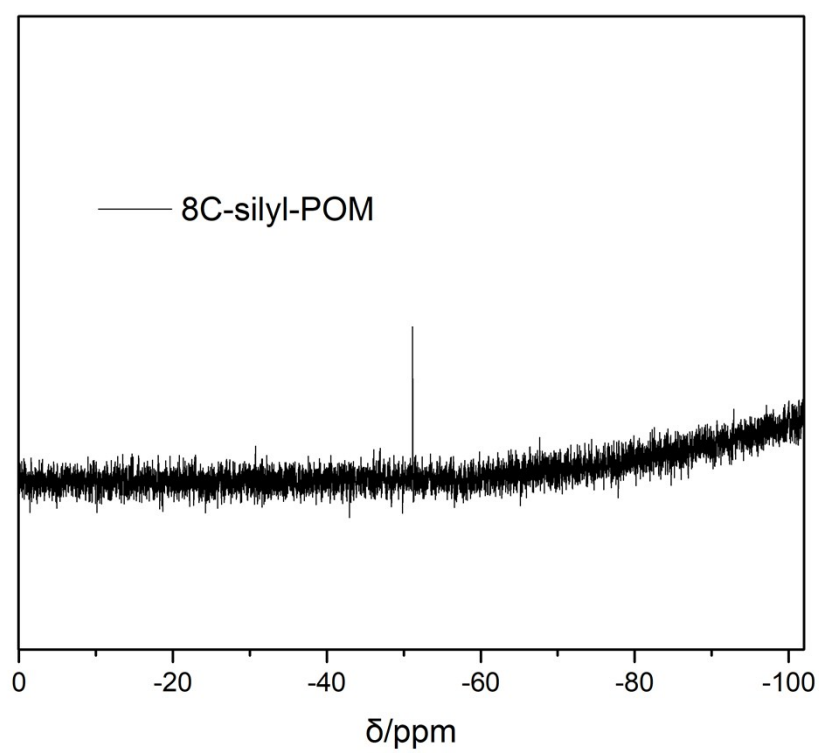

**SI-7**

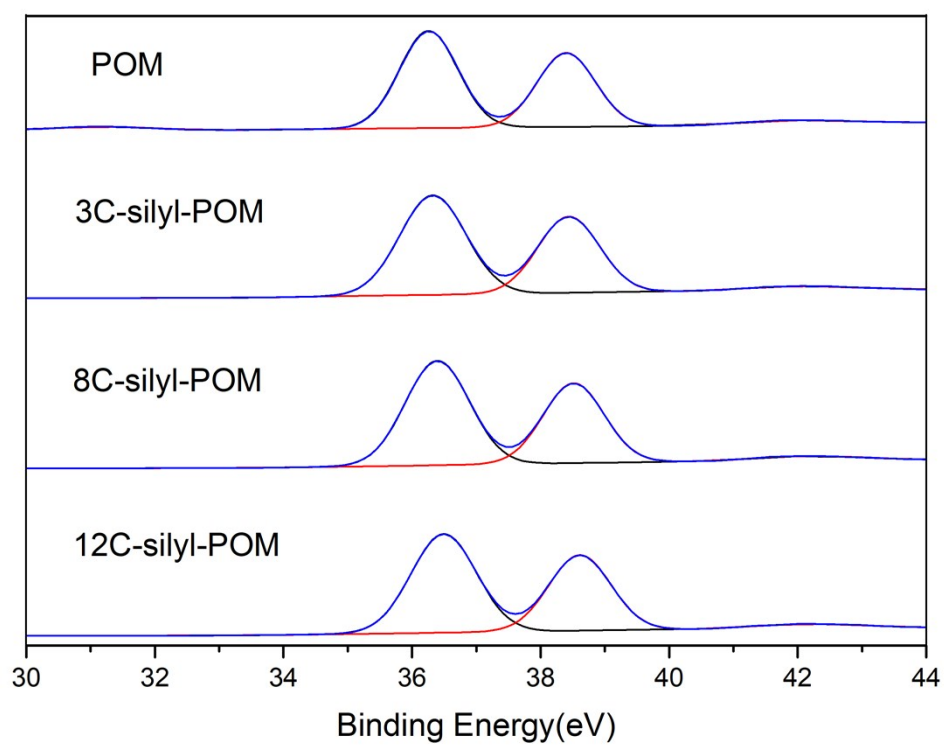

**SI-8**

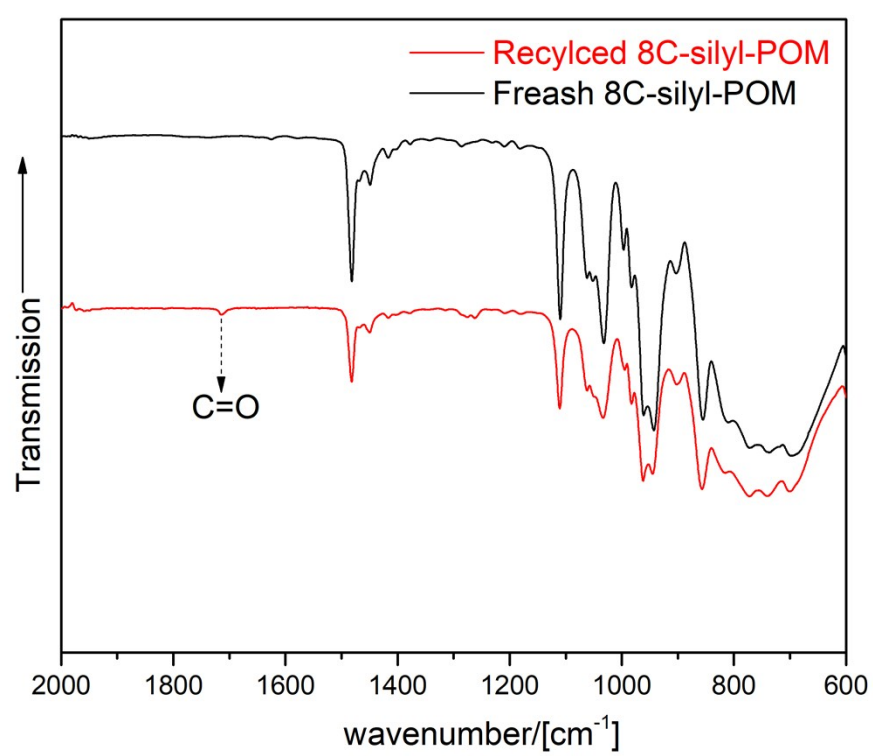

SI-9

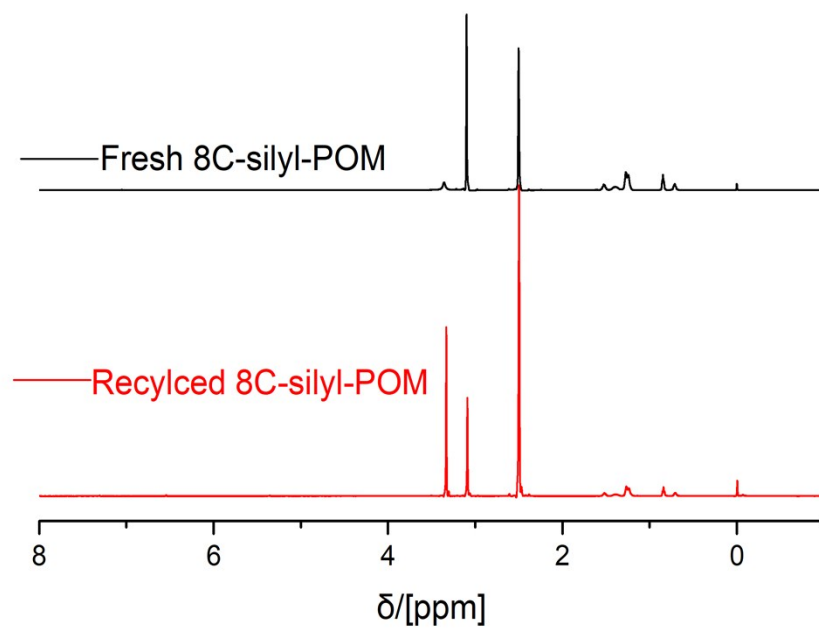

**SI-10**

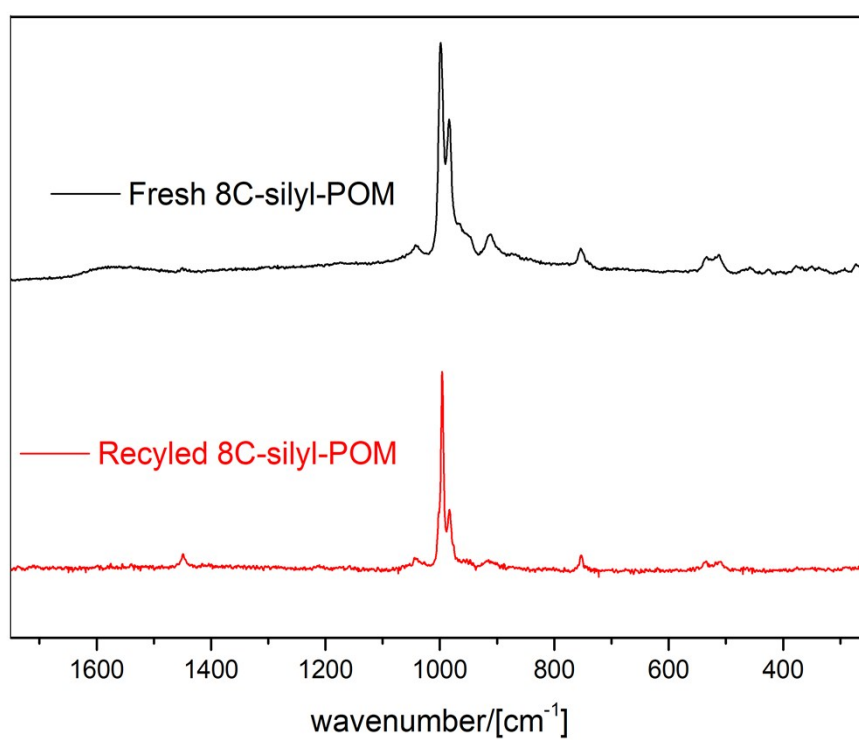

**SI-11**

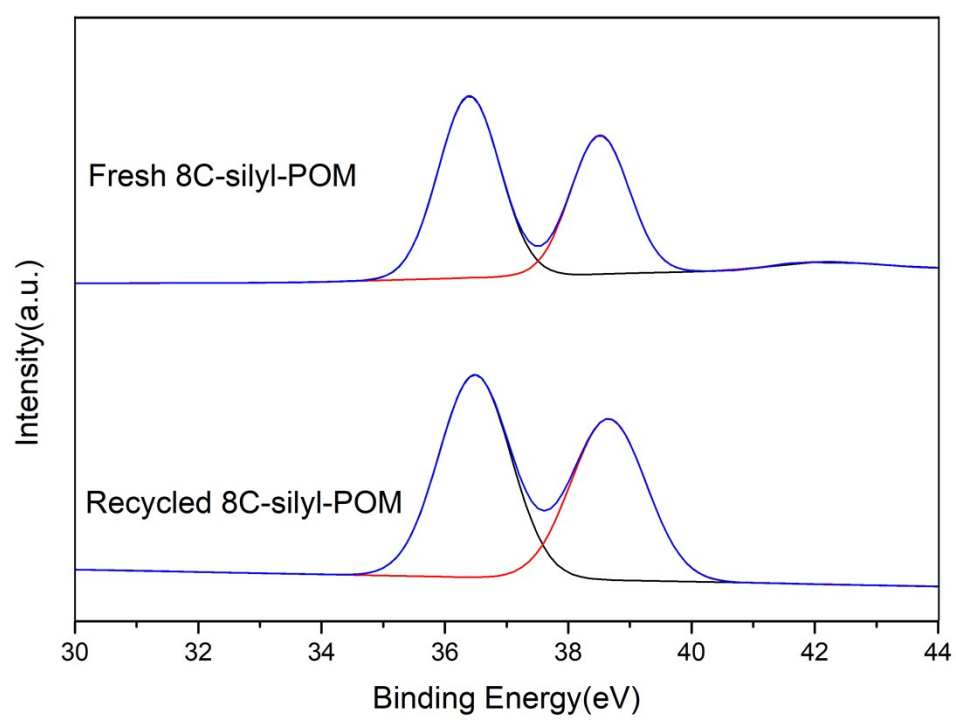

**SI-12**

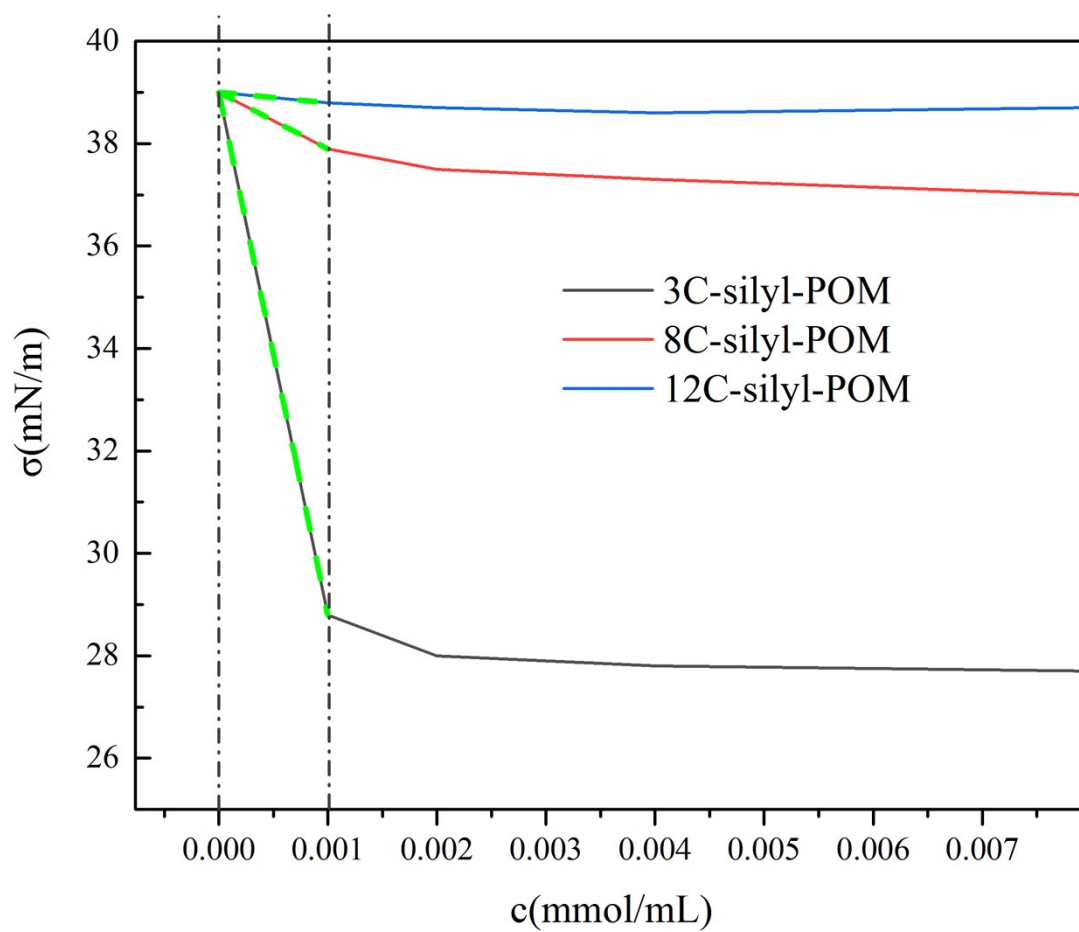

### SI-13

According to the curve of surface tension and catalyst concentration (Figure 3b), the maximum slope in the interval between functions  $c$  and  $\sigma$  is identified (the maximum slope corresponding to 3C-silyl-POM, 8C-silyl-POM and 12C-silyl-POM is -10.2, -1.1 and -0.2, respectively.), and the maximum adsorption capacity ( $\Gamma$ ) of the three catalysts at the surface of benzyl alcohol can be estimated using the Gibbs adsorption equation.

**Table S1.** Polyoxometalates as catalysts for the oxidation of benzyl alcohol with molecular oxygen have been reported in the literatures.

| Entry           | catalyst                                                                             | reaction                                                                          | Temp.<br>(°C) | Solvent | Coverion<br>(%) | Selectivity<br>(%) |
|-----------------|--------------------------------------------------------------------------------------|-----------------------------------------------------------------------------------|---------------|---------|-----------------|--------------------|
| 1 <sup>49</sup> | (PW <sub>11</sub> ) <sub>3</sub> /MCM-41<br>(PW <sub>11</sub> ) <sub>3</sub> /MCM-48 | 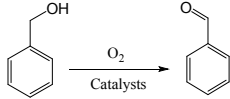 | 90            |         | 30<br>32        | 90<br>89           |
| 2 <sup>50</sup> | H <sub>4</sub> PMo <sub>11</sub> VO <sub>40</sub>                                    | 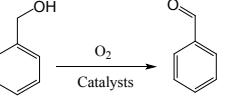 | 150           | DMSO    | 78              | 90                 |

Herein, although the catalytic conversion of the catalysts in the oxidation of alcohol is low, which is consistent with the literature (Table S1).

49. Singh, S.; Patel, A., *Catalysis Letters*, 2016, **146**, 1059-1072.

50. Qian, X.; Li, S.; Banks, M. K.; Xu, W.; Wu, R., *Catalysis Communications*, 2018, **114**, 24-27.
